# 1 **Circumstances and factors of sleep-related sudden** 2 **infancy deaths in Japan**

3

4 Motoki Osawa<sup>1\*</sup>, Yasuhiro Ueno<sup>2</sup>, Noriaki Ikeda<sup>3</sup>, Kazuya Ikematsu<sup>4</sup>, Takuma  
5 Yamamoto<sup>5</sup>, Wataru Irie<sup>6</sup>, Shuji Kozawa<sup>7</sup>, Hirokazu Kotani<sup>8</sup>, Hideki Hamayasu<sup>8</sup>,  
6 Takehiko Murase<sup>4</sup>, Keita Shingu<sup>4</sup>, Marie Sugimoto<sup>2</sup>, Ryoko Nagao<sup>1</sup>, and Yu Kakimoto<sup>1</sup>

7

8 <sup>1</sup> Department of Forensic Medicine, Tokai University School of Medicine, Isehara,  
9 Kanagawa, Japan

10 <sup>2</sup> Department of Legal Medicine, Kobe University Graduate School of Medicine, Kobe,  
11 Hyogo, Japan

12 <sup>3</sup> Department of Forensic Pathology and Sciences, Graduate School of Medical Science,  
13 Kyushu University, Fukuoka, Japan

14 <sup>4</sup> Department of Forensic Pathology and Science, Graduate School of Biomedical  
15 Sciences Nagasaki University, Nagasaki, Japan

16 <sup>5</sup> Department of Legal Medicine, Hyogo College of Medicine, Nishinomiya, Hyogo,  
17 Japan

18 <sup>6</sup> Department of Legal Medicine, Kitasato University School of Medicine, Sagamihara,  
19 Kanagawa, Japan

20 <sup>7</sup> Department of Forensic Medicine and Sciences, Mie University School of Medicine,  
21 Tsu, Mie, Japan

22 <sup>8</sup> Department of Forensic Medicine and Molecular Pathology, Kyoto University  
23 Graduate School of Medicine, Kyoto, Japan

24

25 \* Corresponding author

26 E-mail: [osawa@is.icc.u-tokai.ac.jp](mailto:osawa@is.icc.u-tokai.ac.jp) (MO)

## 28 **Abstract**

29 **Background:** Sudden unexpected death in infancy (SUDI) comprises both natural and  
30 unnatural causes of death. However, a few epidemiological surveys have investigated  
31 SUDI in Japan.

32 **Objective:** This retrospective study was conducted to investigate the recent trends of  
33 circumstances and risk factors of sleep-related SUDI cases.

34 **Methods:** Forensic pathology sections from eight universities participated in the  
35 selection of subjects from 2013 to 2018. Data obtained from the checklist form were  
36 analyzed based on information at postmortem.

37 **Results:** There were 259 SUDI cases consisting of 145 male infants and 114 female  
38 infants with a mean birth weight of  $2888 \pm 553$  and  $2750 \pm 370$  g, respectively. Deaths  
39 most frequently occurred among infants at 1 month of age (18%). According to  
40 population-based analyses, the odds ratio (95% confidence interval) of mother's age  
41  $\leq 19$  years was 11.1 (6.9–17.7) compared with ages 30–39. The odds ratio for the fourth-  
42 and later born infants was 5.2 (3.4–7.9) compared with the frequency of first-born  
43 infants. The most frequent time of day for discovery was between 7 and 8 o'clock.  
44 Co-sleeping was recorded for 61%, and the prone position was found for 40% of cases  
45 at discovery. Mother's smoking habit exhibited an odds ratio of 4.5 (2.9–5.8).

46 **Conclusion:** This study confirmed the trends that have been observed for sudden infant  
47 death syndrome; particularly, very high odds ratios were evident for teenage mothers  
48 and later birth order in comparison with those in other developed countries. The child of  
49 a young mother tended to die within 2 months of age. To our knowledge, this is the first  
50 report of an extensive survey of sleep-related SUDI in Japan.

## 52 **Introduction**

53 Sudden infant death syndrome (SIDS) is the possible cause-of-death for sudden infant  
54 death during sleep, in which all known identifiable conditions that might engender  
55 sudden and unexpected death must be excluded by postmortem examinations. However,  
56 several pathologists have changed their diagnostic preferences since 2004 primarily  
57 because of the difficult distinction of SIDS from accidental asphyxia or natural diseases  
58 such as arrhythmias and metabolic disorders. [1-3] Reluctance to use the term has  
59 decreased the number globally over the years. [4-6] In Japan, around 500 cases of SIDS  
60 were recorded in the 1990s, but recent diagnostic numbers have decreased to fewer than  
61 100 cases per year. [7]

62 Currently, another broad term has become popular, i.e., sudden unexpected death in  
63 infancy (SUDI) or sudden unexpected infant death (SUID). Although SUDI/SUID  
64 originally has been used as an umbrella term for the initial presentation of explained or  
65 unexplained infant deaths, it is interpreted to include several categories such as SIDS  
66 (R95), ill-defined and unknown cause of mortality (R99), and accidental suffocation or  
67 strangulation in bed (W75). [8] Several attempts have been made to categorize  
68 SUDI/SUID, but the terminology and classification have not yet been defined clearly.  
69 [9]

70 In recent years, a protocol of investigation items has been officially standardized.  
71 [10,11] For instance, in the U.S., the Centers for Disease Control and Prevention  
72 published guidelines and a reporting form, which is designated as the SUID  
73 Investigation Reporting Form. [12] In Japan, a list of items to be investigated is used as  
74 a checklist form in cases of infant death. [13] A system is in operation for clinicians and  
75 pathologists to ascertain circumstances and to investigate background factors.

76 Information from death scene investigation (DSI) acquired by experts is indispensable  
77 to fill out the form. [14] Furthermore, the maternity passbook, which records  
78 information about the mother and the child during pregnancy as well as after childbirth,  
79 is beneficial. We previously analyzed forensic autopsy cases of sudden infant deaths  
80 after vaccination using this passbook. [15]

81 While the childcare environment differs according to region and time, there are few  
82 epidemiological data describing infant deaths during sleep in Japan. [16,17] This  
83 population-based retrospective study was conducted to investigate the recent trends of  
84 sleep-related SUDI using the checklist form at multiple centers.

85

86

## 87 **Methods**

88 Deaths of sleep-related SUDI cases were extracted from autopsy files for the period  
89 of 6 years from 2013 to 2018. Inclusion criteria for cases were age not more than 12  
90 months, and the collapse occurring during sleep in an unexpected manner. Based on the  
91 cause and manner of death, infant deaths were grouped as follows: (1) infants who died  
92 of SIDS, (2) infants who died of other natural diseases, (3) infants who died of  
93 accidental injuries, (4) infants who died of non-accidental injuries, and (5) infants with  
94 unexplained manner of death. [18] The term ‘unexplained’ implies insufficient evidence  
95 of the causative disease or event. [9] In this study, we selected cases of groups (1) and  
96 (5) and those of suspected accidental suffocation during sleep.

97 Postmortem examinations included histology, toxicology, biochemistry, virology,  
98 and bacteriology. [19,20] Tests for assessing inherited metabolic disorders were  
99 conducted nationwide in the routine examination for newborns. [21] Genetic testing for

100 arrhythmic disorders was also conducted for cases examined in this study. [22] Data  
101 used for analysis consisted of DSI information, therapeutic information in emergency  
102 care, and maternity passbook. The checklist form, consisting of 41 items, was filled in  
103 initially by each center. Then the lists were transferred to one site to confirm unclear  
104 issues and aggregate the data.

105 The forensic pathology sections of the following eight universities participated in  
106 this study: Kitasato University School of Medicine, Mie University School of Medicine,  
107 Kyoto University Graduate School of Medicine, Hyogo College of Medicine, Kobe  
108 University Graduate School of Medicine, Graduate School of Medical Science Kyushu  
109 University, Graduate School of Biomedical Sciences Nagasaki University, and Tokai  
110 University School of Medicine. The areas of these facilities cover six prefectures in  
111 which approximately 14% of the entire population resides, and this percentage was  
112 applied to calculate the annual rate per 1000. Every sudden infant death had been  
113 autopsied, but there could have been some deaths that had not received autopsy outside  
114 major centers in Japan, whose exact number remained unknown. Although DSI was  
115 performed by the police for all cases, not all items were optimal, particularly, for the  
116 sleep environment such as sleep surface, wrapping, and clothing. The principal  
117 investigator obtained approval for this retrospective study from the Institutional Review  
118 Board for Clinical Research, Tokai University. This study was also approved by the  
119 respective ethical committees of the faculties as a collaborative study.

120 The original causes of death ( $n = 259$ ) were SIDS and suspicious SIDS in 94 cases  
121 (36%), unexplained in 75 cases (29%), potential asphyxia in bed in 51 cases (20%), and  
122 other causes in 39 cases (15%). We investigated each candidate case carefully at a  
123 meeting, and selected subjects in which terminal events remained at speculation

124 irrespective of the diagnosis in the death certificate. Suspected causes of asphyxia were  
125 supposed to be due to accidental overlay and swallowing in bed. Inflammation of the  
126 airway, including bronchitis, accounted for 22 cases, comprising the largest group  
127 among “others.” Despite of such histological evidence, the pathologists reconsidered  
128 that these cases might also be regarded as sleep-related SUDI because of co-sleeping, in  
129 which coexistent factors may have served as contributors in causing death.

130 The statistical data of live births recorded during 2013–2018 in the Japanese  
131 population at the National Institute of Population and Social Security Research  
132 (<http://www.ipss.go.jp/p-info/>) were used as the control. Prevalence information of  
133 regular tobacco consumption was available at Japan Tobacco Inc. as a questionnaire  
134 survey performed in 2016  
135 ([https://www.jti.co.jp/investors/press\\_releases/2016/0728\\_01.html](https://www.jti.co.jp/investors/press_releases/2016/0728_01.html)). The numbers of  
136 smokers and nonsmokers in the 20s and 30s of female volunteers were used for the  
137 control.

138 Logistic regression analyses based on population data were performed to determine  
139 the associations of independent variables as estimated using the odds ratio and  
140 confidence interval (CI). For significant differences, the *p* value was calculated using  
141 chi-square tests. Statistical analyses were conducted using BellCurve in Excel, ver. 3.20  
142 (Social Survey Research Information Co., Tokyo, Japan).

143

144

## 145 **Results**

146 A total of 259 cases were collected at multiple centers for the 6-year period. The  
147 circumstances and factors were investigated using the checklist form filled with

148 information at postmortem.

149 The annual frequency of sleep-related SUDI was estimated to approximately 0.3 per  
 150 1000 births. However, the value could be slightly underestimated because of the  
 151 possibility that some cases could have been out of management by these facilities.

152 Table 1 presents the number of subjects according to sex, birth weight, gestation  
 153 week, maternal age, parity and maternal smoking habit along with the population data.

154 Table 2 summarizes the odds ratios (95% CI) and *p* values in terms of the related factors.

155 The factors were also analyzed for two groups, i.e., the early group in which death  
 156 occurred within 2 months of age (*n* = 98) and the late group in which death occurred  
 157 after 3 months (*n* = 161).

158

159 **Table 1 Number of infants of SUID subjects and live births**

| Factors               | No. of SUID | No. of early/late | No. of live births* | Approx. annual rate per 1000 |
|-----------------------|-------------|-------------------|---------------------|------------------------------|
| <b>Sex</b>            |             |                   |                     |                              |
| Male                  | 145 (56%)   | 53/92             | 3,015,822           | 0.34                         |
| Female                | 114 (44%)   | 45/69             | 2,864,653           | 0.28                         |
| Total                 | 259 (100%)  | 98/161            | 5,880,475           | 0.31                         |
| <b>Birth weight</b>   |             |                   |                     |                              |
| <b>Male</b>           |             |                   |                     |                              |
| < 2,500               | 21 (15%)    | 3/48              | 252,678             | 0.59                         |
| ≥ 2,500               | 116 (85%)   | 18/68             | 2,762,747           | 0.30                         |
| Total                 | 137 (100%)  | 21/116            | 3,015,425           | 0.32                         |
| <b>Female</b>         |             |                   |                     |                              |
| < 2,500               | 23 (21%)    | 9/14              | 304,624             | 0.54                         |
| ≥ 2,500               | 85 (79%)    | 36/49             | 2,559,683           | 0.24                         |
| Total                 | 108 (100%)  | 45/63             | 2,864,307           | 0.27                         |
| <b>Gestation week</b> |             |                   |                     |                              |
| < 37                  | 31 (13%)    | 8/23              | 324,829             | 0.68                         |
| ≥ 37                  | 203 (87%)   | 84/119            | 5,546,995           | 0.26                         |

|                                  |            |        |           |      |
|----------------------------------|------------|--------|-----------|------|
| Total                            | 234 (100%) | 92/142 | 5,871,824 | 0.28 |
| Maternal age at delivery (years) |            |        |           |      |
| ≤ 19                             | 21 (9%)    | 12/9   | 67,675    | 2.22 |
| 20-24                            | 63 (26%)   | 18/45  | 500,757   | 0.90 |
| 25-29                            | 58 (24%)   | 26/32  | 1,538,223 | 0.27 |
| 30-34                            | 53 (22%)   | 15/38  | 2,124,833 | 0.18 |
| 35-39                            | 43 (17%)   | 19/24  | 1,335,169 | 0.23 |
| 40-44                            | 7 (3%)     | 3/4    | 305,543   | 0.16 |
| ≥ 45                             | 0          |        | 8,268     |      |
| Total                            | 245 (100%) | 93/152 | 5,880,468 | 0.30 |
| Parity                           |            |        |           |      |
| 1                                | 77 (31%)   | 38/39  | 2,745,441 | 0.20 |
| 2                                | 93 (38%)   | 26/67  | 2,145,351 | 0.31 |
| 3                                | 46 (19%)   | 20/26  | 760,283   | 0.43 |
| 4                                | 20 (8%)    | 5/15   | 157,536   | 0.91 |
| ≥ 5                              | 10 (4%)    | 4/6    | 50,823    | 1.41 |
| Total                            | 246 (100%) | 93/153 | 5,859,434 | 0.30 |
| Maternal Smoking habit           |            |        |           |      |
| Non-smoker                       | 106 (66%)  | 44/62  | 1,983     | -    |
| Smoker                           | 55 (34%)   | 14/41  | 254       | -    |
| Total                            | 161 (100%) | 58/103 | 2,237     |      |

160 \*: Japanese population data represent the sum of live births during 2013 to 2018.

161

162 **Table 2 Odds ratios (95% CI) and *p* values of SUID including early and late occurrences**

| Factors              | Total (0–11 month)              | Early (0–2 month)               | Late (3–11 month)               |
|----------------------|---------------------------------|---------------------------------|---------------------------------|
| Sex                  |                                 |                                 |                                 |
| Male                 | 1.2 (0.9–1.5), <i>p</i> = 0.13  | 1.1 (0.8–1.7), <i>p</i> = 0.58  | 1.3 (0.9–1.7), <i>p</i> = 0.14  |
| Female (ref. group)  | 1.0                             | 1.0                             | 1.0                             |
| Birth weight         |                                 |                                 |                                 |
| Male                 |                                 |                                 |                                 |
| < 2,500              | 2.0 (1.3–3.2), <i>p</i> = 0.003 | 0.7 (0.2–2.2), <i>p</i> = 0.52  | 2.9 (1.7–4.9), <i>p</i> < 0.001 |
| ≥ 2,500 (ref. group) | 1.0                             | 1.0                             | 1.0                             |
| Female               |                                 |                                 |                                 |
| < 2,500              | 2.3 (1.4–3.6), <i>p</i> < 0.001 | 2.1 (1.0–4.4), <i>p</i> = 0.042 | 2.4 (1.3–4.3), <i>p</i> = 0.003 |
| ≥ 2,500 (ref. group) | 1.0                             | 1.0                             | 1.0                             |



|                                  |                              |                              |                             |
|----------------------------------|------------------------------|------------------------------|-----------------------------|
| Gestation week                   |                              |                              |                             |
| < 37                             | 2.6 (1.8–3.8), $p < 0.001$   | 1.6 (0.8–3.4), $p = 0.18$    | 3.3 (2.1–5.2), $p < 0.001$  |
| ≥ 37 (ref. group)                | 1.0                          | 1.0                          | 1.0                         |
| Maternal age at delivery (years) |                              |                              |                             |
| ≤ 19                             | 11.1 (6.9–17.7), $p < 0.001$ | 18.0 (9.3–34.8), $p < 0.001$ | 7.4 (3.7–14.9), $p < 0.001$ |
| 20–29                            | 2.1 (1.6–2.8), $p < 0.001$   | 2.2 (1.4–3.5), $p < 0.001$   | 2.1 (1.5–2.9), $p < 0.001$  |
| 30–39 (ref. group)               | 1.0                          | 1.0                          | 1.0                         |
| ≥ 40                             | 0.8 (0.4–1.7), $p = 0.56$    | 1.0 (0.3–3.2), $p = 0.96$    | 0.7 (0.3–2.0), $p = 0.51$   |
| Parity                           |                              |                              |                             |
| 1 (ref. group)                   | 1.0                          | 1.0                          | 1.0                         |
| 2–3                              | 1.7 (1.3–2.3), $p < 0.001$   | 1.1 (0.7–1.7), $p = 0.61$    | 2.3 (1.6–3.3), $p < 0.001$  |
| ≥ 4                              | 5.1 (3.4–7.8), $p < 0.001$   | 3.1 (1.5–6.5), $p = 0.0012$  | 7.1 (4.2–12.1), $p < 0.001$ |
| Maternal smoking habit           |                              |                              |                             |
| Non-smoker (ref. group)          | 1.0                          | 1.0                          | 1.0                         |
| Smoker                           | 4.1 (2.9–5.8), $p < 0.001$   | 2.5 (1.3–4.6), $p = 0.002$   | 5.2 (3.4–7.8), $p < 0.001$  |

163

## 164 Age

165 Fig 1 shows the age distribution at the time of death. It was observed that deaths  
 166 most frequently occurred in infants at 1 month of age, consisting of 45 cases (18%). The  
 167 number was found to decrease with age. Deaths occurring within 6 months after birth  
 168 accounted for 180 cases (72%).

169

170 **Fig 1. Age distribution of sleep-related SUDI infants ( $n = 259$ ) examined in this**  
 171 **study.** Key indicates the birth order of infants, in which the column is divided into four  
 172 groups of the first-born infants (blank), the second- and third-born ones (gray), more  
 173 than the fourth-born ones (black), and unknown ones (diagonal).

174

## 175 Birth weight and gestation weeks

176 The mean ( $\pm$  S.D.) birth weight of SUDI infants was  $2885 \pm 556$  g for male subjects  
177 and  $2763 \pm 466$  g for female subjects. These birth weights were lower by 191 g (6%)  
178 and 227 g (8%), respectively, than the national mean birth weights of 3076 g for males  
179 and 2990 g for females recorded in 2017. The percentage of low birth weight infants  
180 was significantly higher than the control group in both sexes. For low birth weight  
181 infants, the highest odds ratio of 2.9 was observed in the late male group.

182 Infants of premature birth were found to be 2.6 times more likely to die from SUDI  
183 than those of mature birth. The late group also showed higher odds ratio than the early  
184 group.

185

## 186 **Maternal age and birth order**

187 The odds ratio of incidence of infant death of mothers whose age  $\leq 19$  years was the  
188 highest at 11.1 compared with mothers aged 30–39 years, and that for mothers aged  
189 20–29 years was 2.1, which showed significant differences. Furthermore, the child of a  
190 teenage mother tended to die within 2 months of age, compared with other generations  
191 (12/21 to 81/225,  $p = 0.04$ ). This finding indicated that mothers of a younger age,  
192 especially teenage, should be considered as the most important risk factor for the  
193 occurrence of sleep-related SUDI.

194 In terms of the birth-order distribution, there were 31% of first-born infants, 38% of  
195 second-born infants, 19% of third-born infants, 8% of fourth-born infants, 2% (6 cases)  
196 of fifth-born infants, 1% (3 cases) of sixth-born infants, and 0.4% (1 case) of  
197 seventh-born infant. The odds ratio to the fatal frequency among the first-born infants  
198 clearly indicated that later birth order constituted an important risk factor. Moreover, as  
199 shown in Figure 1, there were more first-born infants in the early group (38/92) than in

200 the late group (39/154) ( $p < 0.001$ ).

201

## 202 **Time of discovery and sleeping position**

203 Fig 2A shows the distribution of the time of day when an unresponsive infant was  
204 found. There were 30 cases (12%) found between 7 and 8 o'clock a.m., which was the  
205 most frequent time. A large peak was evident between 6 and 9 o'clock in the morning.

206 Fig 2B depicts that the duration between the last time the infant was found alive and  
207 the time of discovery of being unresponsive ( $n = 222$ ), which varied widely from  
208 approximately 10 min to 13 h. The mean duration was  $4.1 \pm 2.7$  h. The collapse was  
209 discovered within 6 h in the majority of cases ( $n = 184$ , 83%).

210

211 **Fig 2. Time of discovery.** A. Distribution of the time of the day at which the first  
212 responder found an unresponsive infant ( $n = 246$ ); B. the time difference between the  
213 time the infant was last seen alive and first found deceased ( $n = 222$ ).

214

215 The first responder ( $n = 252$ ), who discovered the unresponsive infant, was the  
216 mother in 188 cases (75%), followed by the father in 49 cases (19%), a grandmother in  
217 8 cases (3%), a childminder in 2 cases (1%), and others in 6 cases (2%).

218 Co-sleeping was recorded for 143 cases (61%) among a total of 230 available cases.  
219 Table 3 presents the child sleeping position when the collapse was discovered. The  
220 prone position in late SUDI infants accounted for 52% of cases, and there were 19% of  
221 cases with the prone position in the early group.

222

223 **Table 3 Sleep position at the scene**

---

|        | Total (0–11 month) | Early (0–2 month) | Late (3–11 month) |
|--------|--------------------|-------------------|-------------------|
| Spine  | 117 (52%)          | 60 (72%)          | 57 (40%)          |
| Prone  | 89 (40%)           | 16 (19%)          | 73 (52%)          |
| Side   | 16 (7%)            | 7 (9%)            | 9 (6%)            |
| Others | 2 (1%)             | 0                 | 2 (1%)            |
| Total  | 224 (100%)         | 83 (100%)         | 141 (100%)        |

---

224

## 225 **Maternal smoking habit**

226 The descriptions in the maternity passbook entries are considered to reflect the  
227 smoking habits before and during the early phase of pregnancy. We attempted to obtain  
228 the smoking rate of the mothers of SUDI cases. A significant risk of SUDI was evident  
229 with an odds ratio of 4.5 compared with the general rate. Although there were limited  
230 cases wherein the information related to the number of cigarettes ( $n = 30$ ) was available,  
231 the mean number was 11 cigarettes/day.

232

233

## 234 **Discussion**

235 Results of the present investigation of sleep-related SUDI cases were consistent with  
236 risk factors such the smoking habit of parents in the large epidemiological surveys of  
237 SIDS. [23] However, some differences were evident. The peak age of death is generally  
238 2 months in SIDS surveys, [4,24] but that among the present SUDI infants was 1 month  
239 of age. A particularly higher risk was observed among teenage mothers than that found  
240 in an earlier study. [25] Moreover, the mothers tended to lose their infants at age 0–2

241 months.

242 The most frequent birth order associated with infant death due to sleep-related SUDI  
243 was the second birth order. Blair et al. [26] reported that SIDS was most frequent  
244 among first-born children in the UK, although it was earlier presumed to be frequent in  
245 large families. Data from Taiwan indicate that the first-, second-, and third- and later  
246 born children account for 36%, 40%, and 24% of SIDS, respectively. [27] The  
247 distribution in the present study was more similar to that reported in Taiwan.

248 Traditional bedding of cotton mat, known as futon, on the floor is common in Japan.  
249 Therefore, it is more appropriate to use the term co-sleeping (sharing a sleeping surface)  
250 than bed-sharing. Co-sleeping is a common style of sleep, and Tokutake et al. [17]  
251 reported that 84% of mothers practice co-sleeping, of whom half also practice  
252 breastfeeding. The father was found to be the first responder in up to 20% of cases, and  
253 in most of these cases the father also co-slept and discovered the infant death upon  
254 awakening. The risk of SIDS among infants who co-sleep was found to be significantly  
255 high in several earlier studies. [28,29] Nevertheless, the effects of co-sleeping on the  
256 occurrence of SUDI, if any, could not be evaluated in this study because of the absence  
257 of good control subjects.

258 It is a traditional practice in Japan to lay infants in the supine position. However,  
259 42% of infants were found in the prone position, of which frequency was higher than  
260 that reported in an earlier study. [17] Li et al. [30] reported that 60% of SIDS infants  
261 were found in the prone position in the United States. It is possible that turning over by  
262 infants during sleep is a causal factor. However, approximately 30% of infants in the  
263 early group who were unable to turn over were found in the prone and side positions.  
264 They might have been placed in the prone position or been breastfed during co-sleeping,

265 but the original position was not recorded sufficiently at DSI.

266 A relationship between the occurrence of SIDS and the smoking habit of parents has  
267 been found in Japan. [31] In the present investigation, the incidence of pregnant  
268 mother's smoking among SUDI cases was 34%. This incidence in the general female  
269 population was reported as 11%, which also resulted in the high odds ratio of 4.5 in this  
270 study. According to Anderson et al., [32] the incidence of SUDI more than doubles  
271 when a parent is smoking during the period of pregnancy. The odds ratio increases  
272 along with the number of cigarettes up to 20. It is evident that infants co-sleeping with  
273 someone who smokes exhibit the highest risk for SUID. [33]

274 Pasquale-Styles et al. [34] reported that asphyxia and suffocation occur more than  
275 presumed in many situations such as bed-sharing, overlay, wedging, prone position,  
276 obstruction of the nose and mouth, and coverage of the head. Postmortem findings alone  
277 are not generally sufficient to explain the cause of these deaths. Consequently, the  
278 diagnoses often lack consistency. [3,4,7] In addition, there exists a difficulty of the  
279 current situation in Japan, particularly in DSI that is performed by police officers who  
280 are not well trained. Garstang et al. [24] indicated that police-led DSI does not comply  
281 with practical information. After a new law related to child health was enacted in 2018,  
282 child death reviews will be introduced to the society in the near future. These reviews in  
283 combination with multiple agencies will be helpful in investigating the sleeping  
284 environments of infants in detail.

285 In conclusion, we conducted an effective epidemiological analysis of sleep-related  
286 SUDI using the official checklist form. This approach has revealed the present critical  
287 features prevailing in the country. This report is the first of an extensive study of SUDI  
288 in Japan.

289

290

291 **Acknowledgements**

292 We thank Tomohiro Nozima for his extensive support like inputting the large data and  
293 mailing.

## 295 **References**

- 296 1. Krous HF, Beckwith JB, Byard RW, Rognum TO, Bajanowski T, Corey T, et al.  
297 Sudden infant death syndrome and unclassified sudden infant deaths: a definitional  
298 and diagnostic approach. *Pediatrics*. 2004;114:234-238.
- 299 2. Malloy MH, MacDorman M. Changes in the classification of sudden unexpected  
300 infant deaths: United States, 1992-2001. *Pediatrics*. 2005;115:1247-1253.
- 301 3. Camperlengo LT, Shapiro-Mendoza CK, Kim SY. Sudden infant death syndrome:  
302 diagnostic practices and investigative policies, 2004. *Am J Forensic Med Pathol*.  
303 2012;33:197-201.
- 304 4. Moon RY. Task Force on Sudden Infant Death Syndrome. SIDS and other sleep  
305 related infant deaths: expansion of recommendations for a safe infant sleeping  
306 environment. *Pediatrics*. 2011;128:1030-1039.
- 307 5. Fleming PJ, Blair PS, Pease A. Sudden unexpected death in infancy: aetiology,  
308 pathophysiology, epidemiology and prevention in 2015. *Arch Dis Child*.  
309 2015;100:984-988.
- 310 6. Matthews TJ, MacDorman MF, Thoma ME. Infant mortality statistics from the  
311 2013 period linked birth/infant death data set. *Natl Vital Stat Rep*. 2015;64:1-30.
- 312 7. Taylor BJ, Garstang J, Engelberts A, Obonai T, Cote A, Freemantle J, et al.  
313 International comparison of sudden unexpected death in infancy rates using a newly  
314 proposed set of cause-of-death codes. *Arch Dis Child*. 2015;100:1018-1023.
- 315 8. Goldstein RD, Blair PS, Sens MA, Shapiro-Mendoza CK, Krous HF, Rognum TO,  
316 et al. Inconsistent classification of unexplained sudden deaths in infants and  
317 children hinders surveillance, prevention and research: recommendations from the  
318 3rd International Congress on Sudden Infant and Child Death. *Forensic Sci Med*



- 319 Pathol. 2019;15:622-628.
- 320 9. Shapiro-Mendoza CK, Camperlengo L, Ludvigsen R, Cottengim C, Anderson RN,  
321 Andrew T, et al. Classification system for the Sudden Unexpected Infant Death  
322 Case Registry and its application. *Pediatrics*. 2014;134:e210-9.
- 323 10. Corey TS, Hanzlick R, Howard J, Nelson C, Krous H. A functional approach to  
324 sudden unexplained infant deaths. *Am J Forensic Med Pathol*. 2007;28:271-277.
- 325 11. Bennett T, Martin LJ, Heathfield LJ. Global trends in the extent of death scene  
326 investigation performed for sudden and unexpected death of infant (SUDI) cases: A  
327 systematic review. *Forensic Sci Int*. 2019;301:435-444.
- 328 12. Centers for Disease Control and Prevention. Sudden Unexplained Infant Death  
329 Investigation Reporting Form 2007. [www.cdc.gov/sids/pdf/suidiform2-1-2010.pdf](http://www.cdc.gov/sids/pdf/suidiform2-1-2010.pdf).  
330 Accessed 1 Nov 2019.
- 331 13. Guideline for SIDS diagnosis, ver. 2. Ministry of Health, Labour and Welfare,  
332 Japan. (in Japanese), 2012.  
333 [http://www.mhlw.go.jp/bunya/kodomo/sids\\_guideline.html](http://www.mhlw.go.jp/bunya/kodomo/sids_guideline.html) of subordinate  
334 document. Accessed 2 Nov 2019.
- 335 14. Erck Lambert AB, Parks SE, Camperlengo L, Cottengim C, Anderson RL,  
336 Covington TM, et al. Death scene investigation and autopsy practices in sudden  
337 unexpected infant deaths. *J Pediatr*. 2016;174:84-90.
- 338 15. Osawa M, Nagao R, Kakimoto Y, Kakiuchi Y, Satoh F. Sudden infant death after  
339 vaccination: Survey of forensic autopsy files. *Am J Forensic Med Pathol*.  
340 2019;40:232-237.
- 341 16. Takatsu A, Shigeta A, Sakai K, Abe S. Risk factors, diagnosis and prevention of  
342 sudden unexpected infant death. *Leg Med*. 2007;9:76-82.

- 343 17. Tokutake C, Haga A, Sakaguchi K, Samejima A, Yoneyama M, Yokokawa Y, et al.  
344 Infant suffocation incidents related to co-sleeping or breastfeeding in the side-lying  
345 position in Japan. *Tohoku J Exp Med.* 2018; 246:121-130.
- 346 18. Matthews T, McDonnell M, McGarvey C, Loftus G, O'Regan M. A multivariate  
347 "time based" analysis of SIDS risk factors. *Arch Dis Child.* 2004;89:267-271.
- 348 19. Howatson AG. The autopsy for sudden unexpected death in infancy. *Curr Diagn*  
349 *Pathol.* 2006;12:173-183.
- 350 20. Kakimoto Y, Seto Y, Ochiai E, Satoh F, Osawa M. Cytokine elevation in sudden  
351 death with respiratory syncytial virus: A Case Report of 2 Children. *Pediatrics.*  
352 2016;138:e20161293.
- 353 21. Yamamoto T, Mishima H, Mizukami H, Fukahori Y, Umehara T, Murase T, et al.  
354 Metabolic autopsy with next generation sequencing in sudden unexpected death in  
355 infancy: Postmortem diagnosis of fatty acid oxidation disorders. *Mol Genet Metab*  
356 *Rep.* 2015;5:26-32.
- 357 22. Osawa M, Inaoka Y, Ochiai E, Hasegawa I, Satoh F. Variable single C repetitive  
358 tract in KCNQ1: Postmortem molecular testing in a sudden and unexpected death.  
359 *Exp Clin Cardiol.* 2014;20:927-930.
- 360 23. Moon RY, Hauck FR. Risk Factors and Theories In: Duncan JR, Byard RW, editors.  
361 SIDS Sudden Infant and Early Childhood Death: The Past, the Present and the  
362 Future. Adelaide (AU): University of Adelaide Press; 2018.
- 363 24. Garstang J, Ellis C, Sidebotham P. An evidence-based guide to the investigation of  
364 sudden unexpected death in infancy. *Forensic Sci Med Pathol.* 2015;11:345-357.
- 365 25. Colson ER, Willinger M, Rybin D, Heeren T, Smith LA, Lister G, et al. Trends and  
366 factors associated with infant bed sharing, 1993-2010: the National Infant Sleep

- 367 Position Study. *JAMA Pediatr.* 2013;167:1032-1037.
- 368 26. Blair PS, Sidebotham P, Berry PJ, Evans M, Fleming PJ. Major epidemiological  
369 changes in sudden infant death syndrome: a 20-year population-based study in the  
370 UK. *Lancet.* 2006;367:314-319.
- 371 27. Chang HP, Li CY, Chang YH, Hwang SL, Su YH, Chen CW. Sociodemographic  
372 and meteorological correlates of sudden infant death in Taiwan. *Pediatr Int.*  
373 2013;55:11-16.
- 374 28. Hauck FR, Herman SM, Donovan M, Iyasu S, Merrick Moore C, Donoghue E, et al.  
375 Sleep environment and the risk of sudden infant death syndrome in an urban  
376 population: the Chicago Infant Mortality Study. *Pediatrics.* 2003;111:1207-1214.
- 377 29. Blair PS, Sidebotham P, Pease A, Fleming PJ. Bed-sharing in the absence of  
378 hazardous circumstances: is there a risk of sudden infant death syndrome? An  
379 analysis from two case-control studies conducted in the UK. *PLoS One.* 2014;  
380 9:e107799.
- 381 30. Li L, Fowler D, Liu L, Ripple MG, Lambros Z, Smialek JE. Investigation of sudden  
382 infant deaths in the State of Maryland (1990-2000). *Forensic Sci Int.* 2005;  
383 148:85-92.
- 384 31. Tanaka T, Kato N. Evaluation of child care practice factors that affect the  
385 occurrence of sudden infant death syndrome: Interview conducted by public health  
386 nurses. *Environ Health Prev Med.* 2001;6:117-120.
- 387 32. Anderson TM, Lavista Ferres JM, Ren SY, Moon RY, Goldstein RD, Ramirez JM,  
388 et al. Maternal smoking before and during pregnancy and the risk of sudden  
389 unexpected infant death. *Pediatrics.* 2019;143:e20183325.
- 390 33. James C, Klenka H, Manning D. Sudden infant death syndrome: bed sharing with

- 391 mothers who smoke. Arch Dis Child. 2003;88:112-113.
- 392 34. Pasquale-Styles MA, Tackitt PL, Schmidt CJ. Infant death scene investigation and  
393 the assessment of potential risk factors for asphyxia: a review of 209 sudden  
394 unexpected infant deaths. J Forensic Sci. 2007;52:924-929.
- 395

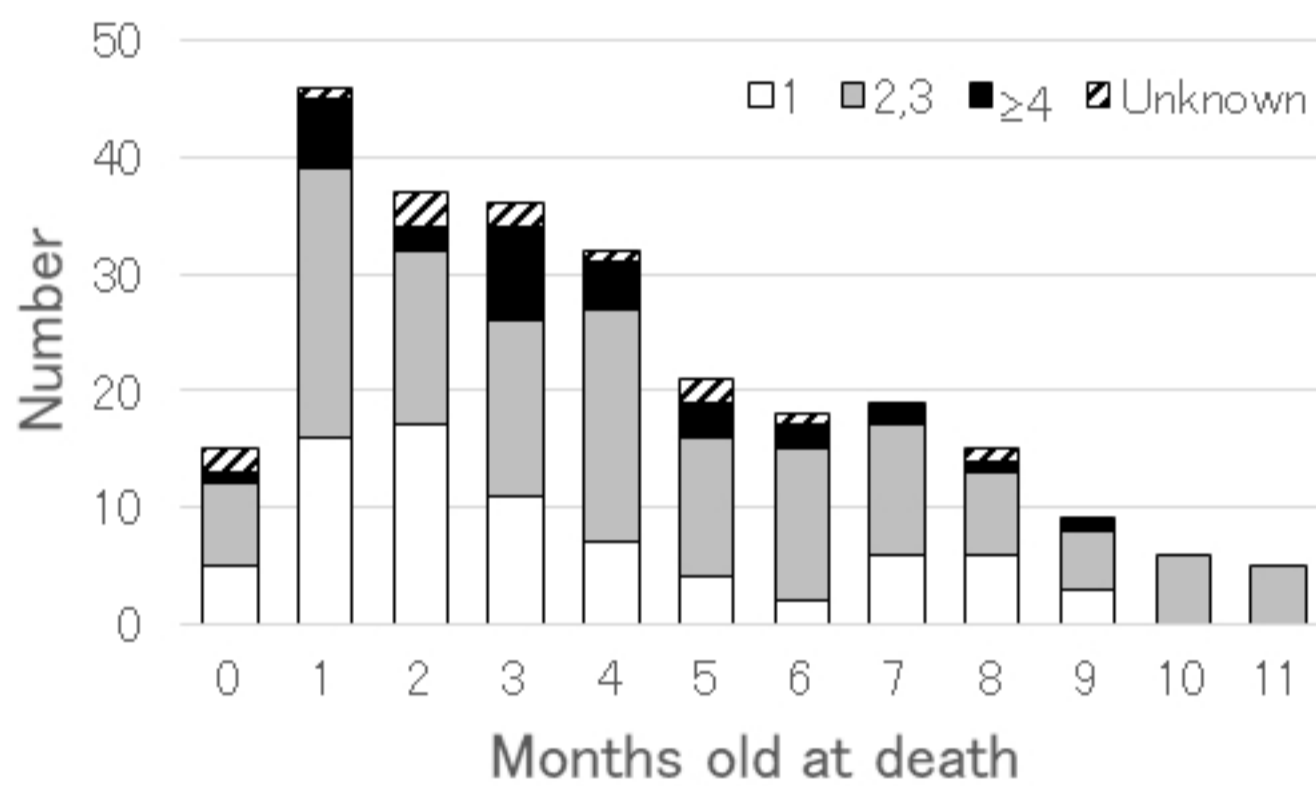

Figure 1

# A

bioRxiv preprint doi: <https://doi.org/10.1101/2020.05.04.076612>; this version posted May 4, 2020. The copyright holder for this preprint (which was not certified by peer review) is the author/funder, who has granted bioRxiv a license to display the preprint in perpetuity. It is made available under aCC-BY 4.0 International license.

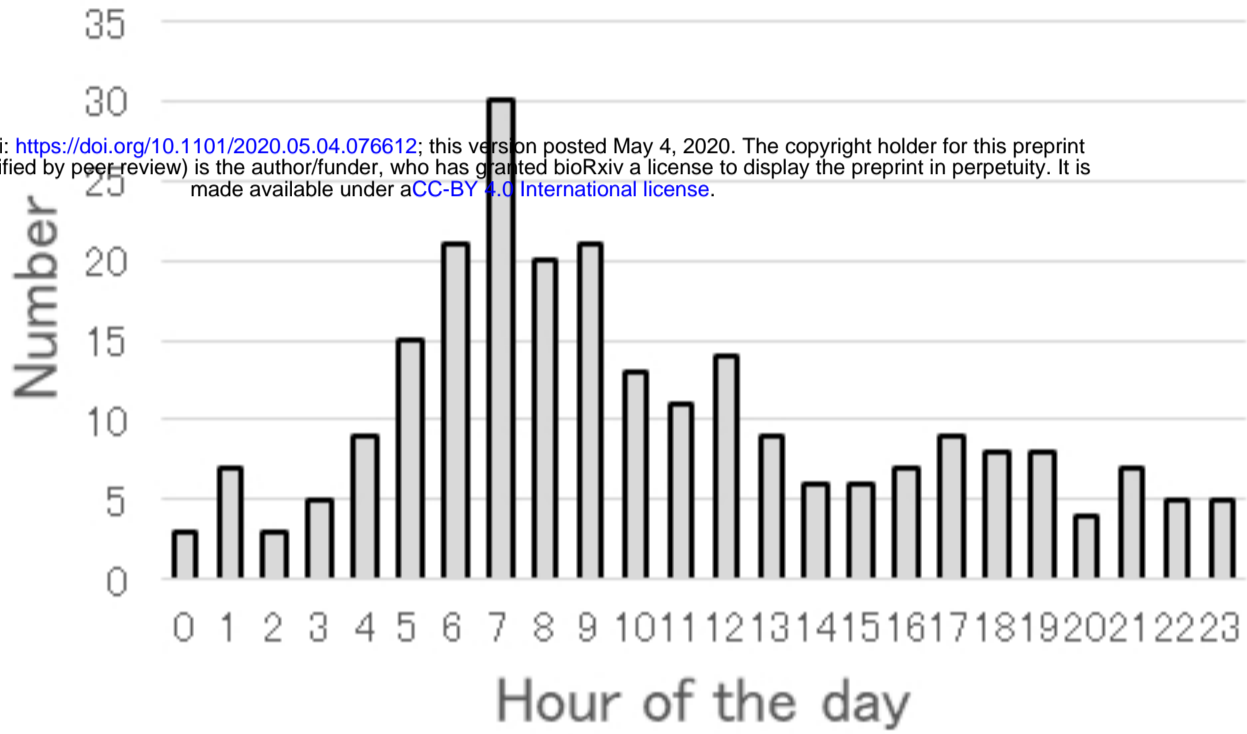

# B

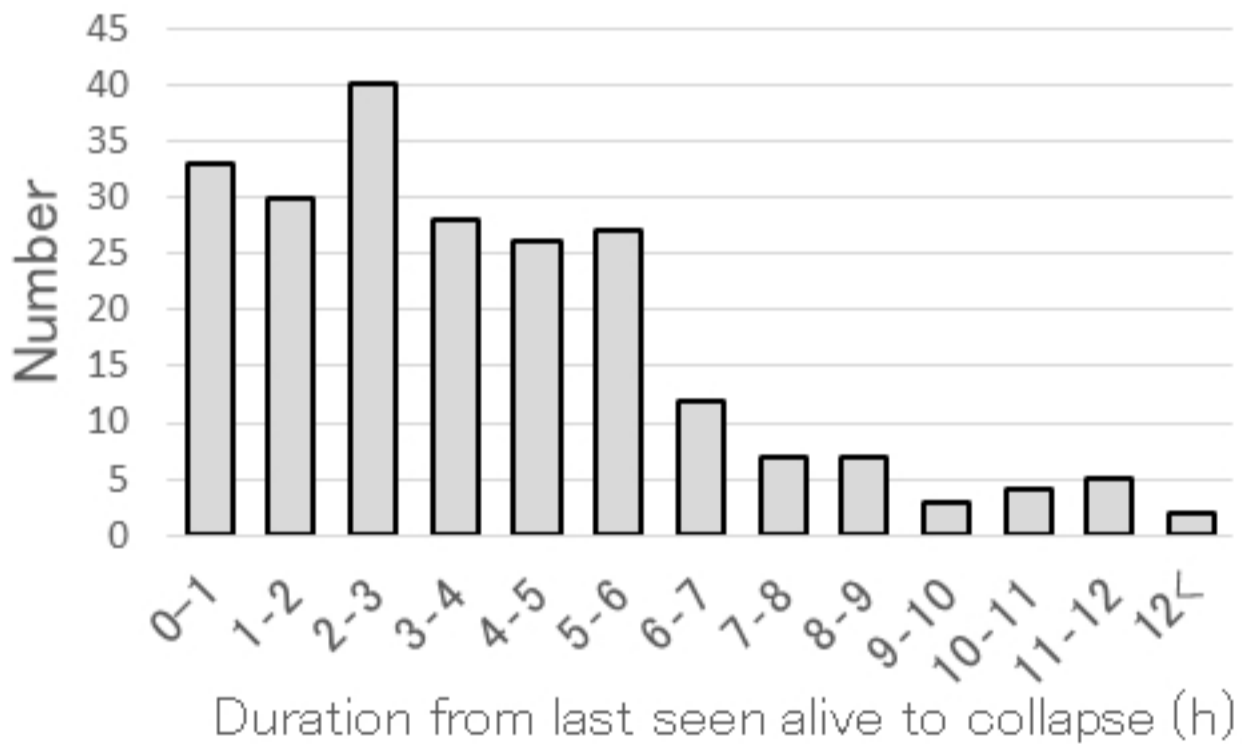

Figure 2
